# Supplementary material for: Removal of Pharmaceuticals in a Macrophyte Pond-Constructed Wetland System and the Effect of a Low Effluent Recirculation
Source: MDPI journal article supplement (doi:10.3390/w14152340), 2022-07-29
Supplement: s1 [file s1]

# Removal of Pharmaceuticals in a Macrophyte Pond-Constructed Wetland System and the Effect of a Low Effluent Recirculation

Rayco Guedes-Alonso, José A. Herrera-Melián, Francisca Sánchez-Suárez, Verónica Díaz-Mendoza, Zoraida Sosa-Ferrera and José J. Santana-Rodríguez

## Supplementary material

**Table S1.** Therapeutic classification and molecular structure of target pharmaceuticals.

| Therapeutic class                 | Compound            | Molecular structure                                                                   |
|-----------------------------------|---------------------|---------------------------------------------------------------------------------------|
| Antibiotics                       | Trimethoprim (TRIM) | 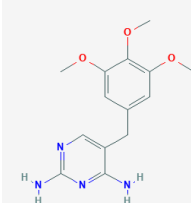   |
|                                   | Erythromycin (ERY)  |  |
| Antihypertensive                  | Atenolol (ATE)      |  |
| Antiepileptic                     | Carbamazepine (CBZ) |  |
| Non-steroidal anti-inflammatories | Naproxen (NPX)      |  |

|                  |                    |                                                                                       |
|------------------|--------------------|---------------------------------------------------------------------------------------|
| Ibuprofen (IBU)  |                    | 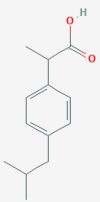   |
| Diclofenac (DIC) |                    |    |
| Lipid regulator  | Gemfibrozil (GEM)  |    |
| Nicotine (NICO)  |                    |   |
| Stimulant        | Caffeine (CAFF)    |  |
|                  | Paraxanthine (PRX) |  |

**Table S2.** Average concentrations ( $\mu\text{g L}^{-1}$ )  $\pm$  std. dev. and (number of positive readings) in 2018 (no recirculation) and 2019 (50 % recirculation).

|             | Recirculation | Influent              | Pond effl.            | CW effluent           |
|-------------|---------------|-----------------------|-----------------------|-----------------------|
| <b>NICO</b> | 0%            | $3.2 \pm 2.0$ (6)     | $0.75 \pm 0.42$ (6)   | $0.17 \pm 0.08$ (6)   |
|             | 50 %          | $2.3 \pm 1.3$ (5)     | $0.30 \pm 0.18$ (6)   | $0.11 \pm 0.10$ (6)   |
| <b>ATE</b>  | 0%            | $0.008 \pm 0.015$ (3) | $0.001 \pm 0.001$ (4) | $0.000 \pm 0.001$ (2) |
|             | 50 %          | $0.007 \pm 0.010$ (2) | $0.009 \pm 0.007$ (5) | $0.006 \pm 0.007$ (4) |
| <b>TRIM</b> | 0%            | 0.00 (0)              | 0.01 (1)              | 0.00 (0)              |
|             | 50 %          | $0.07 \pm 0.16$ (2)   | $0.003 \pm 0.005$ (2) | 0.000 (0)             |
| <b>PRX</b>  | 0%            | $14.3 \pm 8.1$ (6)    | $0.6 \pm 0.8$ (6)     | $0.5 \pm 0.5$ (6)     |
|             | 50 %          | $32.0 \pm 23.7$ (5)   | $1.0 \pm 1.5$ (5)     | $0.02 \pm 0.04$ (2)   |
| <b>CAFF</b> | 0%            | $124 \pm 101$ (6)     | $6.7 \pm 4.1$ (6)     | $2.8 \pm 1.5$ (6)     |
|             | 50 %          | $123 \pm 53$ (5)      | $2.8 \pm 2.3$ (6)     | $0.03 \pm 0.00$ (1)   |
| <b>ERY</b>  | 0%            | 0.000 (0)             | 0.000 (0)             | 0.000 (0)             |
|             | 50 %          | 0.000 (0)             | 0.000 (0)             | 0.000 (0)             |
| <b>CBZ</b>  | 0%            | 0.002 (1)             | < LOQ (0)             | < LOQ (0)             |
|             | 50 %          | 0.000 (0)             | 0.000 (0)             | 0.000 (0)             |
| <b>NPX</b>  | 0%            | $3.4 \pm 2.3$ (6)     | $1.2 \pm 0.2$ (6)     | $0.9 \pm 0.4$ (6)     |
|             | 50 %          | $4.0 \pm 2.1$ (5)     | $1.1 \pm 0.9$ (6)     | $0.4 \pm 0.3$ (6)     |
| <b>IBU</b>  | 0%            | $14.0 \pm 8.8$ (6)    | $6.8 \pm 2.5$ (6)     | $3.3 \pm 1.6$ (6)     |
|             | 50 %          | $4.4 \pm 1.9$ (5)     | $4.0 \pm 1.8$ (6)     | $2.5 \pm 2.0$ (6)     |
| <b>DCLF</b> | 0%            | $0.00 \pm 0.00$ (0)   | $0.015 \pm 0.01$ (5)  | $0.019 \pm 0.008$ (6) |
|             | 50 %          | $0.05 \pm 0.02$ (5)   | $0.08 \pm 0.03$ (6)   | $0.08 \pm 0.03$ (6)   |
| <b>GMF</b>  | 0%            | $0.00 \pm 0.00$ (0)   | $0.04 \pm 0.07$ (2)   | $0.19 \pm 0.05$ (6)   |
|             | 50 %          | $0.03 \pm 0.03$ (5)   | $0.08 \pm 0.05$ (6)   | $0.05 \pm 0.01$ (6)   |

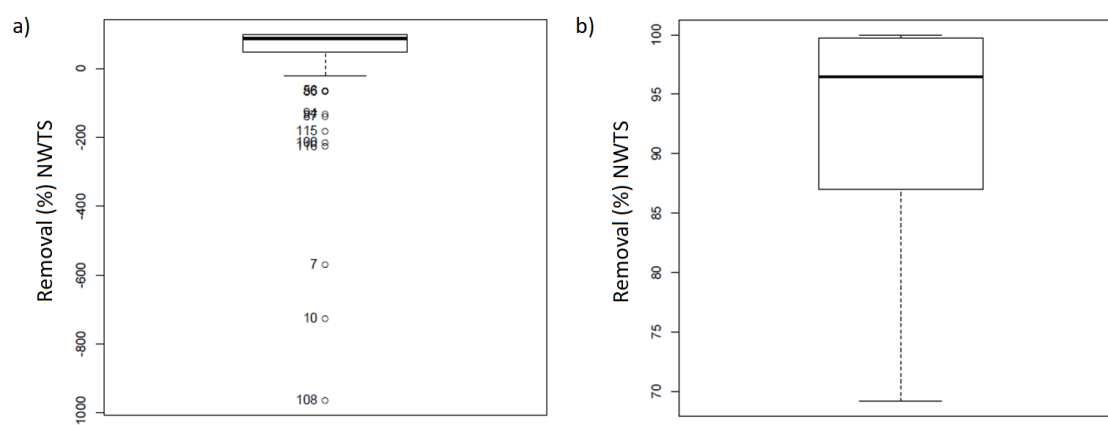

**Figure S1.** Box-plots of obtained removals during the whole study. (a) Preliminary identification of removal outliers for the NWTs; (b) Distribution of removals after the elimination of outliers for the NWTs.

**Table S3.** Values of PNEC of the target pharmaceuticals for *Daphnids* and algae.

|               | PNEC ( $\mu\text{g}\cdot\text{L}^{-1}$ ) <i>daphnids</i> | PNEC ( $\mu\text{g}\cdot\text{L}^{-1}$ )<br>algae | Source |
|---------------|----------------------------------------------------------|---------------------------------------------------|--------|
| Nicotine      | 0.1                                                      | 1                                                 | [1]    |
| Atenolol      | 83                                                       | 78                                                | [2]    |
| Trimethoprim  | 121                                                      | 16                                                | [3]    |
| Paraxanthine  | 178                                                      | 100                                               | [4]    |
| Caffeine      | 46                                                       | 46                                                | [5]    |
| Erythromycin  | 0.02                                                     | 4.3                                               | [3]    |
| Carbamazepine | 76.3                                                     | 85                                                | [3]    |
| Naproxen      | 15                                                       | 22                                                | [3]    |
| Ibuprofen     | 9.02                                                     | 4                                                 | [3]    |
| Diclofenac    | 22                                                       | 14.5                                              | [3]    |
| Gemfibrozil   | 10.4                                                     | 4                                                 | [3]    |

## References

1. Oropesa, A.L.; Floro, A.M.; Palma, P. Toxic Potential of the Emerging Contaminant Nicotine to the Aquatic Ecosystem. *Environ. Sci. Pollut. Res.* **2017**, *24*, 16605–16616. <https://doi.org/10.1007/s11356-017-9084-4>.
2. Yamamoto, H., Nakamura, Y., Nakamura, Y., Kitani, C., Imari, T., Sekizawa, J., Takao, Y., Yamashita, N., Hirai, N., Oda, S., Tatarazako, N. Initial ecological risk assessment of eight selected human pharmaceuticals in Japan. *Environ Sci Int Environ Physiol Toxicol* **2007**, *14*(4), 177–193.
3. Ginebreda, A., Muñoz, I., de Alda, M.L., Brix, R., López-Doval, J., Barceló, D. Environmental risk assessment of pharmaceuticals in rivers: relationships between hazard indexes and aquatic macroinvertebrate diversity indexes in the Llobregat River (NE Spain). *Environ Int* **2010**, *36*(2), 153–162.
4. MacGillivray, A.R. Contaminants of emerging concern in the Tidal Delaware River. Pilot Monitoring Survey 2007–2009. Delaware River Basin Commission. 2013.
5. Kosma, C. I., Lambropoulou, D. A., & Albanis, T. A. Investigation of PPCPs in wastewater treatment plants in Greece: occurrence, removal and environmental risk assessment. *Sci Tot Environ*, **2014**, *466*, 421–438.
